# Supplementary material
Source: publisher site journal article supplement (https://www.spandidos-publications.com/4232/downloadSupplementary)
Supplement: Supplementary file 1 [file downloadSupplementary]

## Sheet: List of genes
Table SVI. List of genes (cut-off ≥ 3 patients) affected by CNA in Venn diagram.
Subset	DGC	IGC	NAG	DGC and IGC	DGC and NAG	IGC and NAG	DGC and IGC and NAG
Total	1317	596	21	420	19	8	60
	ATP2B3	ASMTL	CES1P1	GRIA3	DANT2	NF1	ADAM3A
	FAM58A	ASMTL-AS1	LINC00623	HAUS7	TESC-AS1	SCAPER	ADAM5
	ARHGAP4	CD99P1	LINC00869	ABCD1	CT45A10	SMG6	ADAM6
	ATF6	ACOT9	UGT2B15	ADCY8	CT45A7	MRC1	ATP6AP2
	AVPR2	BRWD3	BTNL3	AFF2	LINC00226	PDZRN4	DMD
	BGN	CDKL5	GALNTL6	ANOS1	MIR4507	PRH1-TAS2R14	GPC3
	CAMK1G	DMBT1	LEF1	BCAP31	MIR4537	RASSF5	IL1RAPL1
	EMD	IL3RA	LOC101060389	CACNA1C	MRGPRX1	TAS2R43	KIAA0125
	FLG	MYH11	LOC440434	COL22A1	OR4C6		MID2
	FLNA	NDE1	MAP3K2	EFR3A	OR4S2		TENM1
	HECTD1	NRXN1	MIR548T	EYA1	CD99		XG
	HHLA1	NUP98	SLC2A11	FAM135B	CT45A1		DPP6
	LAMB3	PCSK2	TBC1D3	FHIT	CT45A2		GAB3
	LCE1B	RSPH10B	TBC1D3C	FLG-AS1	CT45A5		GRB10
	LCE1C	RSPH10B2	TBC1D3E	KCNB2	CT45A6		KCNK9
	LCE1E	XIAP	TBC1D3F	KCNQ3	CT45A8		KRTAP9-7
	LINC00861	ABCA4	TBC1D3G	KHDRBS3	CT45A9		MIR4539
	LOC100130950	ANO2	TBC1D3H	LCE1D	FIP1L1		NHS
	MAGEA9	ARMCX4	TBC1D3I	LINC00051	NLGN4X		RAD51B
	MAGEA9B	ATP7A	TBC1D3K	LINC00824			RBFOX1
	MIR1302-7	BCR	TBC1D3L	LMX1A			RPS6KA3
	MIR4260	BEND2		LOC100505795			SLC6A14
	PROX1	CACNB2		MIR4472-1			SPRY3
	PROX1-AS1	CADM2		MIR650			CHM
	RXRG	CSNK1G1		MIR7848			DIAPH2
	SCIMP	CTNNA3		NDRG1			ENOX2
	SIPA1L2	DECR1		OC90			EYS
	SLC24A3	DLC1		PAK3			FGF13
	SLC6A8	ERBB4		PBX1			GPC5
	ABHD18	FBXO16		PLXNB3			JAK1
	ACKR1	FGD1		RBM33			LOC101928389
	ACP6	GSR		SLA			LOC644919
	ADORA1	IMMP2L		TG			NBPF20
	AGT	KIAA2022		TNR			NBPF9
	ARHGAP6	LINC00106		TSNARE1			XGY2
	ASCL5	LOC101927960		WISP1			ACSL4
	ASMT	MACROD2		ZFAT			CNTNAP2
	ASTN1	MBP		ZFAT-AS1			DHRSX
	ATP11C	MSI2		ADGRB1			DLEU1
	ATP1A2	MYOM2		ALK			FMR1
	ATP1B1	OFD1		ASAP1			MCF2
	BAZ1A	PCCB		ASPH			MFHAS1
	BCL9	PPP2R5C		ATRX			MIR4538
	C1orf105	PTK2		BRINP2			NLGN3
	C1orf111	RAD54B		CACNA1C-IT3			OR4P4
	C1orf116	SLC25A6		CASK			SLC25A43
	C1orf204	SPANXA2-OT1		CELF2			SLC26A1
	C1orf226	THOC2		CHCHD6			STS
	C1orf68	TPD52		CHD7			SEP06
	CACNA1C-AS4	TSR2		CLCN5			ATXN10
	CACNA1E	ZDHHC15		COL4A5			HSF2BP
	CACNA1S	ZNF385B		CYP19A1			KCNMA1
	CADM3	AGO2		CYP2C18			NRG1
	CADM3-AS1	SEP14		DUSP22			OR52N1
	CCDC190	ABCC4		EXT1			OR52N5
	CD34	ABCD4		FER1L6			PAX7
	CD48	ACAD10		FER1L6-AS1			PRH1
	CFAP45	ACKR3		FER1L6-AS2			PRH1-PRR4
	CHCHD7	ACOX1		FLG2			TJP2
	CHI3L1	ADAM28		GLI3			TP63
	CNGA2	ADAM7		GPHN
	CNTN2	ADGRD1		GRID1
	COG2	ADK		HHAT
	CPQ	AHSA1		IGLL5
	CYHR1	AIMP2		KIRREL3
	DDR2	AKAP14		LARP1B
	DUSP23	AKAP9		LINGO2
	DUSP9	ALG13		LOC100131107
	EFNB1	AMOTL1		LOC100288181
	FAM78B	ANGPT2		LOC344967
	FASLG	ANKH		LOC400794
	FCAMR	ANKRD31		LRBA
	FCMR	ANKS1B		LY6D
	FCRL5	ANTXR1		LYNX1
	FCRL6	AP1S3		LYPD2
	FOXH1	APOO		MAMLD1
	FOXP3	APPBP2		MIR1268A
	GJA5	ARAF		MIR5571
	GOLT1A	ARGFX		MROH5
	GPT	ARPP21		N4BP2
	GTF3C6	ARSD		NOS1AP
	HES5	ARSE		PDS5A
	HPYR1	ASAH1		PDXDC1
	IDH3G	ASIC2		PTP4A3
	IGBP1P1	ATAD2		PVT1
	IGF1R	ATE1		RPL10
	IGSF8	ATP2B2		RXRA
	IGSF9	ATP6V1E1		S100A11
	IL19	ATP9A		SLURP1
	IL20	ATXN1		SNORD116-20
	IL24	ATXN2		SNORD116-21
	ILDR2	BCYRN1		SNORD116-22
	IVL	BEND3		SNORD116-23
	JAG1	BPNT1		SNORD116-24
	KCNJ10	BRAP		SNORD116-25
	KCNJ9	BRCA2		SNORD116-26
	KCNN3	BREA2		SRP54
	KIAA0040	BTK		SSTR4
	KIFC2	BUB1B-PAK6		TCHH
	KISS1	C14orf159		TCHHL1
	KPRP	C2orf74		THEM6
	LCE1A	C5orf66		TMEM255A
	LCE1F	C8B		TRAPPC9
	LCE2A	CA5B		TRPS1
	LCE2B	CA6		USH2A
	LCE2C	CA8		ADCK1
	LCE2D	CADM1		ADGRG4
	LCE4A	CASC11		ARF4
	LCE6A	CASC4		ARF4-AS1
	LINC00538	CCDC120		ARHGAP39
	LINC00970	CCDC166		ARHGEF9
	LINC01133	CCDC7		ASAP1-IT1
	LOC100505918	CCZ1		BCL2L13
	LOC101928565	CCZ1B		BNC2
	LOC101928596	CD86		C10orf11
	LOC101929341	CDC73		C14orf178
	LOC105373383	CDCA2		CACNA1F
	LOC284788	CDH22		CASC8
	LRRC14	CDH23		CDH4
	MAEL	CDK3		CDK6
	MAGEA11	CEBPD		CHEK2
	MECP2	CEP112		CNIH3
	MFSD3	CEP128		CNPY1
	MIR1208	CERKL		COL4A6
	MIR205	CFAP61		CSMD1
	MIR205HG	CFP		CXorf40A
	MIR4259	CHFR		DCX
	MIR4713	CHST9		DENND1B
	MIR488	CLASRP		DEPDC5
	MIR556	CLDN10		DHX57
	MIR6870	CLEC4C		DLGAP1
	MIR921	CLIC2		DNA2
	MSC-AS1	CNGB3		EDN3
	MTR	CNOT4		EGFR
	MYBPH	CNST		EP300
	NBPF18P	CNTLN		EPHB1
	NFASC	COG5		ETS1
	NME7	COL11A1		FAF1
	NTM	COL26A1		FAM110C
	OLFML2B	COLEC10		FBXL17
	OPRK1	COX10		GALNT18
	PANK4	COX7B		GPC4
	PAPPA2	CPA6		GPR20
	PFKFB2	CPNE4		H19
	PHF20L1	CSF2RA		HOTS
	PIGC	CSGALNACT1		IKZF1
	PIGM	CTIF		JRK
	PIGR	CTNND2		KCNS2
	PLAG1	CTPS2		KIF16B
	PLCH2	CTSLP2		KLF6
	PLEKHA6	CXorf56		LINC00850
	PLXNA2	DAB1		LINC00894
	PPP1R16A	DBX2		LINC01219
	PPP1R3F	DCAF12		LOC100507642
	PTPRC	DCP1B		LRRK1
	RBFOX2	DCTN6		LY6K
	RBX1	DDX3X		MGMT
	RECQL4	DDX59		MIR1-1HG
	RPF2	DENND4C		MIR1207
	RPL23AP53	DENND5B		MIR548N
	RPTN	DEPTOR		MIR675
	SLAMF8	DGKI		MIR7641-2
	SLAMF9	DLGAP2		MTM1
	SLX4IP	DMRT1		NAA10
	SMCP	DNAH3		NAV2
	SNORD116-14	DOCK5		NBPF4
	SNORD116-15	DOCK8		NCALD
	SNORD116-16	DOPEY2		NR0B1
	SNORD116-17	DPP10		NRG3
	SNORD116-18	DPPA3		NTRK2
	SNORD116-19	DPRXP4		NTRK3
	SNORD116-27	DSCC1		NUMB
	SNORD116-28	DUSP21		NXPH1
	SNORD116-29	EBF2		OPHN1
	SNORD116-30	ECE1		PAK2
	SNX25	EIF2AK1		PAPD7
	SPOCK3	EIF3H		PARD3
	SRPK3	ELF4		PARK2
	ST18	EML5		PATJ
	SUCO	EPRS		PCDH9
	SUSD4	ERC1		PDE12
	TAGLN2	EVPL		PDE4DIP
	THBD	EXOSC4		PHACTR3
	TMEM9	F8A1		PLXNA4
	TNN	F8A2		PSCA
	VSIG8	F8A3		PTPRD
	XCL1	FAAH2		PUDP
	XCL2	FAM21A		RABEP1
	YOD1	FAM45BP		RALYL
	ZFHX4	FAM49B		SAMD12
	ZNF596	FAM83H		SH3D19
	ACACA	FAM83H-AS1		SLC25A16
	ADAM15	FANCA		SLC25A24
	AFF4	FAT3		SLC30A8
	AIM2	FBXL20		SLC35F2
	AKAP17A	FBXO32		SMS
	AMELX	FDFT1		SNORA70
	AP4S1	FGL1		ST3GAL1
	APCS	FLI1		STK3
	AR	FLJ42969		SYNDIG1
	ARC	FLT3		TDRP
	ARHGAP22	FLVCR1		TET1
	ARHGEF16	GADL1		TTC28
	BBOF1	GCOM1		TTN
	BMP2	GDF3		TTN-AS1
	BRINP3	GDPD1		UBE2K
	BTBD3	GLI4		WDFY4
	C10orf120	GNE		XKR4
	C17orf78	GNG12		ZBTB20
	C1orf132	GPAA1		ZFPM2
	C1orf185	GPM6B		ACOT1
	C4orf36	GPR1		AGBL4
	C8orf33	GRHL2		AKT3
	C8orf82	GRIK2		ALKBH1
	CCDC22	GRINA		ANGPTL2
	CD84	GRM8		ANKRD36B
	CD93	GTF2E2		ANKRD55
	CELF4	GTF2IP1		ARHGEF10
	CETN2	GTF2IP4		ARHGEF6
	CKS1B	H2AFB1		ARHGEF7
	CLSTN2	H2AFB2		ARNTL
	CNTNAP5	H2AFB3		BCAS3
	COL15A1	H2AFY		BECN2
	COL5A1	HDAC4		BMPR2
	COLGALT2	HHEX		C14orf169
	CRB1	HIP1		C20orf166-AS1
	CRCT1	HIVEP3		C5orf49
	CRNN	HMBOX1		C8orf37-AS1
	CSAG1	HSP90AA1		CDH13
	CSAG3	HTR2C		CFAP46
	CSAG4	HTRA1		CNTN4
	CSMD3	IL7		COL4A1
	CYCSP52	INO80		COL4A2
	CYP7B1	INSR		CRIM1
	DACH1	ISM2		DAB2IP
	DCST1	ITGA4		DCAF4
	DCST2	ITPK1		DHTKD1
	DEFA1	JPX		DIP2B
	DEFA10P	KATNAL2		DIP2C
	DEFA1B	KCNA2		DNAH12
	DEFA3	KCNC4		DPPA2
	DEFA4	KCNC4-AS1		DPPA4
	DEFA8P	KCND2		DUSP10
	DEFA9P	KCND3		DYNC1H1
	DEFT1P	KCNMA1-AS1		EBF1
	DEFT1P2	KCTD9		EEF1D
	DENND2C	KDM5C		EIF4G3
	DENND6A	KIAA1429		EPPK1
	DIEXF	KIF13B		ERICH1
	DMBT1P1	KIF14		ERICH1-AS1
	DNASE1L1	KLF5		ETV6
	DNM3	KLF8		FABP5
	DPM3	KLHL15		FBN1
	DPT	KPNA7		FEZ2
	DRAM1	LEPROTL1		FGF14
	DRG1	LHFPL3		FRMPD4
	DUSP27	LINC00301		GABRG3
	EDA	LINC00588		GATA5
	EEFSEC	LINC00620		GLI2
	EFCAB1	LINC01205		GPC6
	EFNA1	LINC01572		GPIHBP1
	EFNA3	LINC01609		GRIN2B
	EFNA4	LOC100128993		GRM3
	EN2	LOC100130298		GSDMD
	ENTPD5	LOC101927844		GTF2IRD2
	ERO1A	LOC101928160		GTF2IRD2B
	ESRRG	LOC101928402		HAVCR1
	ETV3	LOC101928530		HEATR4
	F9	LOC101929128		HOXA10
	FAM189B	LOC101929172		HOXA10-AS
	FAM49A	LOC101929294		HOXA10-HOXA9
	FATE1	LOC101929315		HOXA5
	FBXO25	LOC101929319		HOXA6
	FBXO36	LOC101929372		HOXA7
	FCER1A	LOC102723557		HOXA9
	FCRL4	LOC102724301		HOXA-AS3
	FLAD1	LOC105369438		HOXC10
	FOXA2	LOC105375650		HOXC11
	FRYL	LOC105375713		HOXC4
	G0S2	LOC105375800		HOXC5
	GBA	LOC286114		HOXC6
	GBAP1	LOC286177		HOXC8
	GDAP1	LOC441601		HOXC9
	GEMIN6	LPCAT1		HOXC-AS1
	GPA33	LRIG2		HOXC-AS2
	GPM6A	LRRCC1		HOXC-AS3
	HRNR	LUZP1		HPSE2
	HSD17B7	LYN		JMJD1C
	HSFX1	LYPD6B		KBTBD11
	HSFX2	MAFA		KBTBD11-OT1
	IFI16	MAFA-AS1		KCNQ1
	IGFN1	MAGT1		KRT86
	IL10	MAL2		L2HGDH
	IPW	MALRD1		LINC00632
	JMY	MAPK10		LINC00893
	JPH1	MAPK15		LMBR1
	KCNT2	MAST4		LMF1
	KDM4C	MBOAT4		LOC101927055
	KIAA0391	MCC		LOC101928058
	KIF21B	MCPH1		LOC101928143
	KIRREL	MCPH1-AS1		LOC101928924
	KRT82	MED1		LOC101929427
	KRT83	MED10		LOC102467222
	KRT84	MEGF11		LOC105376360
	KRT85	MICAL2		LOC401442
	KRTCAP2	MICU1		MAOA
	LAD1	MICU3		MAOB
	LANCL3	MINCR		MBD5
	LCE3A	MIPOL1		MBNL2
	LCE3B	MIR1184-1		MCHR1
	LCE3C	MIR1184-2		MIR1-1
	LCE3D	MIR1184-3		MIR133A2
	LCE3E	MIR1205		MIR196A2
	LCE5A	MIR1206		MIR196B
	LENEP	MIR1273E		MIR4278
	LINC00261	MIR3150A		MIR4470
	LINC00269	MIR3150B		MIR4669
	LINC00624	MIR325HG		MIR4768
	LINC00626	MIR4454		MIR661
	LINC00840	MIR4660		MIR6845
	LINC00841	MIR4664		MIR8073
	LINC01281	MIR5194		MROH6
	LINC01282	MIR5682		MSRA
	LINC01300	MIR5708		MVB12B
	LINC01384	MIR6075		MYH9
	LINC01521	MIR615		NCF1C
	LINC01591	MIR646HG		NFIB
	LOC100126784	MIR6836		NKAIN3
	LOC100422212	MIR6841		NLRC4
	LOC100505666	MIR6846		NOP58
	LOC100507548	MIR6847		NPAS3
	LOC101448202	MIR6894		NRBP2
	LOC101926908	MIR7160		NRON
	LOC101927066	MIR937		NRP2
	LOC101927178	MITF		NUP155
	LOC101927845	MKLN1		OCLN
	LOC101928009	MKRN7P		OPCML
	LOC101928087	MLLT4		OR51A2
	LOC101928335	MORC3		ORC3
	LOC101928404	MOSPD1		OXR1
	LOC101928778	MRPS28		P2RY8
	LOC101929268	MSL2		PAG1
	LOC101929413	MSN		PCDH11X
	LOC101929653	MSR1		PCGF6
	LOC101929771	MTBP		PCK1
	LOC101930114	MTFR1		PDE4D
	LOC102723672	MTMR7		PHACTR4
	LOC102724661	MTSS1		PKN2
	LOC105372897	MTUS1		PLEC
	LOC105373352	MYC		PPP2R3B
	LOC148696	MYO9B		PPP4R3A
	LOC284648	MYT1		PRSS3P2
	LOC401557	NACAP1		PSD3
	LOC727993	NBEAL1		PTK2B
	LRRC18	NBN		PTPN11
	LRRC24	NCF1		PTPRN2
	LRRC52	NCF1B		PTPRT
	LRRC6	NCOA2		PUF60
	LYPLAL1	NCOA3		PYCRL
	MAGEA12	NDUFAF6		RAB39A
	MAGEA2	NDUFB9		RAD51C
	MAGEA2B	NECTIN1		RAD52
	MAGEA3	NEFL		RALGPS1
	MASTL	NEFM		RBBP8NL
	MEGF6	NFIA		RBM25
	MFSD8	NGF		RCC1
	MGAT5	NKAP		REST
	MID1	NKX2-6		SCAI
	MIR181A1	NLRP7		SCML2
	MIR181A1HG	NOTCH2		SEC23A
	MIR181B1	NR5A2		SEMA5A
	MIR346	NRXN2		SEMA6D
	MIR4258	NRXN3		SGCZ
	MIR4294	NSL1		SHOX
	MIR4486	NSMCE2		SHROOM4
	MIR4654	NTNG1		SIRPB1
	MIR502	NUDCD1		SLC18A1
	MIR551A	NUDT1		SLC25A17
	MIR624	OCM		SLCO4A1
	MIR660	OPLAH		SLCO4A1-AS1
	MIR92B	OR51A4		SLIRP
	MOB1B	PAPD4		SND1
	MRPL23	PARD3B		SNHG3
	MRPL23-AS1	PARP10		SNORA73B
	MTMR1	PAX8		SNW1
	MTX1	PAX8-AS1		SNX6
	MUC1	PCM1		SOS2
	NAV2-AS4	PDE4B		SOX6
	NAV2-AS5	PDE7A		SPAG9
	NCRNA00250	PDGFRL		SPINK2
	NEK1	PEX26		SRPX2
	NPBWR2	PHF8		STAU2
	NSDHL	PIBF1		STX16
	NUF2	PIK3CA		STX16-NPEPL1
	OLFM1	PIK3R1		STXBP5L
	OPRL1	PKHD1		TAOK1
	OR10J3	PKHD1L1		TCF7L2
	OR2T10	PMS2		TEAD1
	OR2T11	PMS2P2		TENM4
	OR4F6	PMS2P5		TEX14
	OR6P1	PMS2P7		TIGD5
	OR8S1	PNOC		TMEM255B
	PCDH19	PNPT1		TPO
	PCMT1	POM121		TRPM7
	PDYN	PPP1R13B		TSHZ2
	PGBD2	PPP1R3B		TSNAX-DISC1
	PJA1	PPP2CB		TSPAN9
	PKP1	PPP2R2A		TSTA3
	PLCB1	PPP2R3A		TTC27
	PLXNA1	PPP3CC		ULK2
	PNCK	PRAF2		UNQ6494
	POGK	PRDM6		WBP4
	POP3	PRKDC		WWOX
	PPP1R12B	PRKX		XKR6
	PPP2R3C	PSPC1		ZC3H3
	PRDM16	PTPN21		ZDHHC9
	PRICKLE3	PWWP2B		ZEB2
	PRR14L	RAB9A		ZFYVE1
	PRRG3	RABEPK		ZNF407
	PWAR1	RANBP17		ZRANB3
	PYHIN1	RARS2
	RGL1	RBMS2
	RGS16	RBMX
	RGS4	RBMY1F
	RGS5	RCBTB1
	RGS8	RERE
	RGSL1	RGS13
	RNASEL	RGS20
	RPS3A	RHPN1
	RWDD4	RHPN1-AS1
	S100A10	RIMS2
	SCAMP3	RNF135
	SCML1	RNF216
	SEC16B	RNU5F-1
	SEC24A	ROR1
	SELE	RP2
	SELL	RPA2
	SHC1	RPH3A
	SHPK	RPS20
	SIRPA	RPS6KA2
	SLAMF1	RPTOR
	SLC10A6	RRN3
	SLC17A5	SAT1
	SLC24A2	SATB2
	SLC38A7	SCAP
	SLC50A1	SCFD2
	SLCO3A1	SCRIB
	SMARCC1	SDHAP3
	SMIM14	SDK1
	SNAI2	SENP5
	SNORD116-10	SETBP1
	SNORD116-11	SGCE
	SNORD116-12	SGSM2
	SNORD116-13	SH2D1A
	SNORD116-3	SH2D4A
	SNORD116-9	SIPA1L3
	SNORD73A	SLC1A7
	SPAST	SLC25A18
	SPRR1A	SLC2A14
	SPRR1B	SLC2A3
	SPRR2A	SLC38A5
	SPRR2B	SLC6A11
	SPRR2C	SLC6A17
	SPRR2D	SLC6A3
	SPRR2E	SLC9A6
	SPRR2F	SLIT2
	SPRR2G	SMAD5
	SPRR3	SMARCA4
	SPRR4	SMIM18
	SSR4	SMPDL3B
	STRN3	SNORA11B
	STUM	SNORD54
	SYN1	SNORD61
	SYP	SNORD70
	SYP-AS1	SNRPN
	TACC2	SNTB1
	TADA1	SNTB2
	TAZ	SNTG1
	THBS3	SNX4
	TMEM18	SNX8
	TMEM185A	SOWAHD
	TNNI1	SPANXA1
	TNNT2	SPANXA2
	TONSL	SPATA17
	TOX	SPATC1
	TRABD2B	SPDYE8P
	TRAPPC11	SPIDR
	TRIM46	SPOCK1
	TRPA1	SPTLC2
	TRPV1	SRP68
	TUBD1	SRPRB
	UGDH-AS1	SRPX
	USP34	SSX1
	WDR89	SSX4
	XK	SSX4B
	ZBTB7B	STAG2
	ZGRF1	STAG3L1
	ZNF185	STAG3L2
	ZNF280C	STAG3L3
	ZNF75D	STC1
	ZNF831	STMN2
	ABCG2	STPG2
	ABHD3	STX8
	ACBD5	STXBP6
	ACOT4	SUGCT
	ACOT6	SYAP1
	ACP1	SYBU
	ACSL1	SYCP2
	ACTRT2	SYTL5
	ADAP2	TAF1
	ADARB2	TAF2
	ADCYAP1R1	TAF4
	ADGRA1	TAF4B
	ADGRA1-AS1	TASP1
	AGAP12P	TBATA
	AKAP10	TCEB1
	AMBP	TCEB3C
	AMD1	TCEB3CL
	AMMECR1	TCEB3CL2
	ANAPC2	TCF4
	ANKRD10	TECPR2
	ANKRD13C	TEN1
	ANO4	TEN1-CDK3
	ANXA13	TEX11
	APCDD1L-AS1	TFB2M
	APELA	TGFBI
	APEX2	TGS1
	APLN	THRB
	AQP1	TIMM8A
	ARFGAP1	TMC7
	ARGLU1	TMED10
	ARHGEF11	TMEM132E
	ARNT2	TMEM163
	ASTN2	TMEM236
	ATAD2B	TMEM75
	ATG4A	TMLHE
	ATP11A	TMPRSS12
	ATP1A4	TNFAIP6
	ATP4B	TOP1MT
	ATRNL1	TP53TG3
	BCAS1	TP53TG3B
	BCAS2	TP53TG3C
	BCOR	TRDN
	BEND5	TRIM35
	BHLHE22	TRIO
	BIRC7	TRIP11
	BMS1P5	TRMT2B
	BRCC3	TRNAU1AP
	BTG2	TSC1
	C10orf128	TSHR
	C15orf32	TSHZ1
	C18orf32	TSPAN18
	C1orf198	TSPAN7
	C1orf21	TTYH1
	C1orf61	TUSC3
	C1orf74	UBE2V2
	C1QTNF8	UBXN8
	C20orf202	ULK4
	C8A	UPF3B
	C8G	USP9X
	C8orf37	VCPIP1
	C9orf142	VEGFA
	C9orf173-AS1	VPS13B
	CACNA1B	VPS37A
	CACNA1H	WDR1
	CAMK2B	WDR44
	CAMLG	WDR45
	CAPN9	WDR70
	CASC19	WNK1
	CASC20	WNK3
	CASC21	YIPF6
	CCAR1	ZBTB16
	CCAT1	ZC3H14
	CCAT2	ZFP41
	CCDC125	ZMAT4
	CCDC171	ZMIZ1
	CCDC183	ZMIZ1-AS1
	CCDC183-AS1	ZMYM5
	CCDC66	ZNF136
	CCDC70	ZNF331
	CCSER1	ZNF334
	CD5L	ZNF395
	CDH1	ZNF430
	CDK5RAP2	ZNF567
	CDK7	ZNF623
	CECR1	ZNF652
	CECR2	ZNF674
	CELF2-AS1	ZNF675
	CELF2-AS2	ZNF696
	CENPU	ZNF704
	CEP72	ZNF706
	CFAP52	ZNF707
	CFAP54	ZNF710
	CFAP97	ZNF815P
	CHAMP1	ZNF839
	CHD1L	ZNRF1
	CHIT1
	CHRNA2
	CHRNA4
	CLEC18B
	CLIC3
	CLK2
	CLVS1
	CMPK2
	CNKSR2
	COL13A1
	COL20A1
	COL27A1
	COL4A2-AS2
	COPS3
	COPS4
	COQ6
	CRH
	CRLF2
	CRP
	CST1
	CTCFL
	CTD-3080P12.3
	CXCL12
	CXorf40B
	CYBB
	CYSRT1
	DAGLB
	DCAF1
	DDX31
	DDX46
	DEFA11P
	DEFA6
	DENND3
	DENND5A
	DHX30
	DIAPH2-AS1
	DISC1
	DLEU1-AS1
	DMXL1
	DNAH10
	DNAJC12
	DNAL1
	DNM3OS
	DOCK9
	DOCK9-AS1
	DPF3
	DPY30
	DYSF
	EAPP
	EBF3
	EDNRB
	EDNRB-AS1
	EEF1A1
	EFNB2
	EIF4E
	EIF4ENIF1
	ELK1
	ELMO1
	EN1
	ENOX1
	ENPP6
	ESR2
	ETNK2
	ETV3L
	F11-AS1
	F5
	FAM110B
	FAM122A
	FAM150B
	FAM155A
	FAM155B
	FAM161B
	FAM163A
	FAM166A
	FAM170B
	FAM170B-AS1
	FAM177A1
	FAM188B
	FAM25C
	FAM25G
	FAM63B
	FAM87A
	FAM91A1
	FAM92A1P2
	FASTKD3
	FBXW5
	FCGR1A
	FCRL1
	FGF13-AS1
	FGF14-AS1
	FGF14-AS2
	FGF14-IT1
	FKBP1A
	FKBP1A-SDCBP2
	FLCN
	FLJ16779
	FMO5
	FMO9P
	FRMD7
	FRMPD2
	FRMPD2B
	G6PD
	GABRE
	GADD45G
	GAGE10
	GALNT2
	GARNL3
	GAS6
	GAS6-AS1
	GAS6-AS2
	GATA1
	GDF10
	GDF2
	GDF7
	GEMIN2
	GHRHR
	GINM1
	GJA8
	GLIS3
	GLIS3-AS1
	GLTPD2
	GLUD1P7
	GM140
	GMDS
	GML
	GOT2
	GPAT3
	GPC6-AS1
	GPX1
	GRIN1
	GRIN3A
	GRK1
	GRSF1
	GTF2B
	GUCY2F
	H2BFXP
	HACE1
	HAVCR2
	HDAC6
	HEATR5A
	HHLA3
	HIST2H2AA3
	HIST2H2AA4
	HIST2H2BC
	HIST2H2BF
	HIST2H3A
	HIST2H3C
	HIST2H3D
	HIST2H4A
	HIST2H4B
	HMCN1
	HNRNPA3P1
	HOTAIR
	HOTTIP
	HOXA11
	HOXA11-AS
	HOXA13
	HOXC12
	HOXC13
	HS6ST2
	HSD11B1
	IDS
	IGF2
	IGF2-AS
	INA
	INMT-FAM188B
	INS
	INS-IGF2
	INSRR
	INTS2
	INTS6
	INTU
	IQGAP3
	IRF6
	IRS2
	ISM1
	ISM1-AS1
	KATNA1
	KCNG3
	KCNK2
	KCNQ1OT1
	KIF12
	KIF9-AS1
	KIFAP3
	KIRREL3-AS2
	KIRREL3-AS3
	KLB
	KLHL29
	KLHL38
	KRT75
	LAMP5
	LAMP5-AS1
	LARP7
	LATS1
	LCN12
	LCNL1
	LDAH
	LELP1
	LIN54
	LINC00221
	LINC00282
	LINC00284
	LINC00332
	LINC00354
	LINC00390
	LINC00403
	LINC00431
	LINC00443
	LINC00452
	LINC00501
	LINC00536
	LINC00540
	LINC00548
	LINC00551
	LINC00552
	LINC00558
	LINC00565
	LINC00619
	LINC00687
	LINC00930
	LINC00951
	LINC00967
	LINC00982
	LINC01043
	LINC01044
	LINC01054
	LINC01070
	LINC01115
	LINC01136
	LINC01142
	LINC01166
	LINC01167
	LINC01168
	LINC01207
	LINC01363
	LINC01456
	LINC01567
	LINC01613
	LKAAEAR1
	LNX2
	LOC100101478
	LOC100130587
	LOC100289473
	LOC100506016
	LOC100506023
	LOC100506470
	LOC100506790
	LOC100507346
	LOC100996583
	LOC101060385
	LOC101060391
	LOC101060553
	LOC101927497
	LOC101927798
	LOC101927822
	LOC101928021
	LOC101928120
	LOC101928336
	LOC101928730
	LOC101928786
	LOC101928797
	LOC101928807
	LOC101928917
	LOC101929159
	LOC101929217
	LOC101929229
	LOC101929395
	LOC101929441
	LOC101929754
	LOC102723448
	LOC102723886
	LOC102724623
	LOC102724710
	LOC102724957
	LOC104054148
	LOC104613533
	LOC105370369
	LOC105372493
	LOC105373368
	LOC105373378
	LOC105374820
	LOC105375115
	LOC105376772
	LOC105378367
	LOC105379143
	LOC107161159
	LOC115110
	LOC283922
	LOC286083
	LOC338797
	LOC339529
	LOC339593
	LOC340512
	LOC401463
	LOC643339
	LOC645967
	LOC646268
	LOC79160
	LOR
	LRFN2
	LRP11
	LRP1B
	LRP2BP
	LRRC26
	LRRC4
	LRRC69
	LRRC71
	LUCAT1
	LVCAT8
	MAFB
	MAGEA4
	MAK
	MAP1LC3C
	MARVELD2
	MB21D1
	MBNL3
	MCF2L
	MCF2L-AS1
	MEF2D
	METTL11B
	METTL16
	MGARP
	MGST3
	MIR1200
	MIR124-3
	MIR1251
	MIR1254-2
	MIR1281
	MIR1296
	MIR1322
	MIR147A
	MIR1539
	MIR199A2
	MIR21
	MIR2114
	MIR214
	MIR224
	MIR302A
	MIR302B
	MIR302C
	MIR302D
	MIR30B
	MIR30D
	MIR3119-1
	MIR3119-2
	MIR3120
	MIR3124
	MIR3125
	MIR3167
	MIR3196
	MIR3621
	MIR367
	MIR3689A
	MIR3689B
	MIR3689C
	MIR3689D1
	MIR3689D2
	MIR3689E
	MIR3689F
	MIR3937
	MIR4326
	MIR452
	MIR4523
	MIR455
	MIR4686
	MIR4694
	MIR4756
	MIR4765
	MIR483
	MIR500B
	MIR504
	MIR5189
	MIR548AX
	MIR548F3
	MIR548H3
	MIR557
	MIR5579
	MIR5591
	MIR5687
	MIR5693
	MIR6073
	MIR629
	MIR6813
	MIR6842
	MIR6869
	MIR6893
	MIR708
	MIR765
	MIR8079
	MIR9-1
	MKL1
	MMP16
	MNDA
	MPP1
	MROH9
	MSC
	MTO1
	MTRNR2L6
	MTRR
	MTUS2
	MYO16
	MYO16-AS1
	MYOG
	MYT1L
	NAA15
	NAPRT
	NDOR1
	NDUFC1
	NELFB
	NFAT5
	NHS-AS1
	NHSL2
	NIPSNAP1
	NKAIN4
	NME1
	NME1-NME2
	NME5
	NMNAT3
	NOTCH1
	NPIPB15
	NSFL1C
	NTRK1
	NTSR1
	NUP160
	NUP43
	NUP88
	ODF2
	OLFM4
	OLR1
	OR10G3
	OR10J1
	OR10K1
	OR10R2
	OR10X1
	OR10Z1
	OR4F13P
	OR4F15
	OR51G1
	OR6K2
	OR6K3
	OR6K6
	OR6N1
	OR6N2
	OR6Y1
	OSBP2
	OTC
	P2RY4
	PAK5
	PALM2
	PALM2-AKAP2
	PAPPA
	PARD3-AS1
	PAX5
	PBXIP1
	PCDH17
	PCNP
	PCSK5
	PCSK6
	PDIA3P1
	PDZD4
	PEAR1
	PEX10
	PFKFB1
	PGLYRP3
	PGLYRP4
	PHEX
	PHKA1
	PHLPP1
	PHYH
	PI4KA
	PINX1
	PIP5K1B
	PISD
	PKIA
	PKIA-AS1
	PLA2G4A
	PLAC8
	PLCB4
	PLD2
	PLEKHA5
	PLPP1
	PMVK
	PNMA3
	PNMA5
	PNMA6A
	POLR1D
	POLR2F
	POLR3K
	POU2F1
	POU5F1B
	PPFIA4
	PPM1D
	PRIMPOL
	PRKG1
	PRMT2
	PRR9
	PRRX1
	PRSS1
	PSMA8
	PSMB6
	PSMC6
	PSMD12
	PSMF1
	PTCH1
	PTGDS
	PTPN20
	PYGO2
	RABGAP1L
	RABL6
	RAC1
	RAD17
	RAD21L1
	RAD54L2
	RAF1
	RAI2
	RALGAPA1
	RALGAPA1P1
	RALGAPA2
	RAP2A
	RASAL2
	RBM47
	RBM6
	RCC1L
	REN
	RER1
	RET
	RGS19
	RHBDF1
	RHOA
	RHOU
	RMST
	RNF138P1
	RNF144A
	RNF144A-AS1
	RNF208
	RNF224
	RNGTT
	RNU6-2
	ROCK1
	RPL17
	RPL17-C18orf32
	RPS18P9
	RPS26P11
	RPS6KB1
	RSAD2
	S100A12
	S100A7
	S100A7A
	S100A7L2
	S100A8
	S100A9
	SAGE1
	SALL2
	SAR1B
	SASH1
	SCYL3
	SDCBP2
	SDCBP2-AS1
	SELP
	SENP6
	SERPINE3
	SETD2
	SFI1
	SH3BP5L
	SHISA9
	SIRPB2
	SIRPD
	SIRPG
	SIRPG-AS1
	SIRT1
	SLC30A5
	SLC30A6
	SLC34A3
	SLC6A18
	SLC6A19
	SLC8A1
	SLC8A1-AS1
	SLC8A3
	SLMAP
	SLTM
	SMIM10L2A
	SMIM2
	SMIM2-AS1
	SMIM2-IT1
	SMOC1
	SMPX
	SNAP25
	SNAP25-AS1
	SND1-IT1
	SNORA111
	SNORA70B
	SNORA70C
	SNORA89
	SNORD11
	SNORD115-1
	SNORD115-10
	SNORD115-12
	SNORD115-2
	SNORD115-3
	SNORD115-4
	SNORD115-5
	SNORD115-6
	SNORD115-9
	SNORD116-8
	SNORD11B
	SNORD140
	SNORD141A
	SNORD141B
	SNORD58A
	SNORD58B
	SNORD58C
	SNPH
	SNRNP25
	SNRPD1
	SNTG2
	SORBS2
	SORCS3
	SOX1
	SOX13
	SPATA13
	SPIC
	SPIRE1
	SPPL2A
	SPTA1
	SPTLC3
	SRPK2
	SSNA1
	SSTR5
	SSTR5-AS1
	ST8SIA2
	STARD13
	STARD13-AS
	STAU2-AS1
	STK35
	STOX2
	STPG3
	SUV39H1
	SYT14
	TAOK3
	TCEA2
	TDRG1
	TEX21P
	TEX29
	TEX35
	TFDP1
	TGFBR1
	TH
	THOC5
	TLE3
	TLN2
	TLR4
	TM4SF5
	TMED10P1
	TMEM120B
	TMEM141
	TMEM192
	TMEM203
	TMEM210
	TMEM41B
	TMEM52B
	TMEM71
	TMEM74
	TMEM74B
	TMSB15B
	TNFRSF14
	TONSL-AS1
	TPPP
	TPRG1L
	TPRN
	TRAF3IP3
	TRAPPC8
	TRIB2
	TRIM55
	TRIM60
	TRIML1
	TRIML2
	TRPM8
	TSEN15
	TSPYL5
	TUBB4B
	TXN2
	UBE2G1
	UBE2QL1
	UBXN2A
	UHRF1BP1L
	USP4
	USP9Y
	VMO1
	VMP1
	VPS28
	VSIG1
	VSTM2A
	VSTM2A-OT1
	VSTM4
	VTI1A
	WDR47
	WNT7A
	WNT8A
	WRAP73
	XPNPEP3
	XPO1
	YIPF4
	YME1L1
	YTHDF1
	YWHAE
	ZBTB18
	ZFHX4-AS1
	ZFP42
	ZFPM1
	ZNF252P
	ZNF252P-AS1
	ZNF275
	ZNF410
	ZNF449
	ZNF462
	ZNF469
	ZNF618
	ZNF672
	ZNF692
	ZNRF3
	ZYG11B
